# Supplementary material for: Current Microbiology of Surgical Site Infections in Patients with Cancer: A Retrospective Review
Source: Springer Nature journal article supplement (doi:10.1007/s40121-014-0048-4), 2014-11-18
Supplement: MOESM1 [file 9339666]

- Patients with solid tumors frequently undergo surgical procedures and develop procedure-related infections.
- We sought to describe the current spectrum of surgical site infections (SSIs) and to determine whether our regimens for surgical prophylaxis are adequate or need updating.
- We conducted a retrospective review of microbiologic data between January 2011 and February 2012 in patients with solid tumors.
- The sites studied were those associated with breast cancer surgery, thoracotomy, craniotomy, percutaneous endoscopic gastrostomy (PEG)-tube insertion, and abdominal/pelvic surgery.
- Polymicrobial infections (42%) and Gram-negative bacilli monomicrobial infections (13%) were relatively frequent causes of SSIs; many of these infections were caused by organisms that are resistant to agents commonly used for surgical prophylaxis.

This summary slide represents the opinions of the authors. Sponsorship for this study was funded by University of Texas MD Anderson Cancer Center. For a full list of acknowledgments and conflicts of interest for all authors of this article, please see the full text online. Copyright © The Authors 2014. Creative Commons Attribution Noncommercial License (CC BY-NC).
